# Supplementary material for: Sympathetic Innervation Regulates Osteocyte‐Mediated Cortical Bone Resorption during Lactation
Source: PubMed Central journal article supplement (PMC10288263; doi:10.1002/advs.202207602), 2023-04-26
Supplement: ADVS-10-2207602-s001.pdf [file ADVS-10-2207602-s001.pdf]

## Supporting Information

for *Adv. Sci.*, DOI 10.1002/adv.202207602

Sympathetic Innervation Regulates Osteocyte-Mediated Cortical Bone Resorption during Lactation

*Qiaoyue Guo, Ningrong Chen, Cheng Qian, Cheng Qi, Kathleen Noller, Mei Wan, Xiaonan Liu, Weixin Zhang, Patrick Cahan and Xu Cao\**

**Fig. S1**

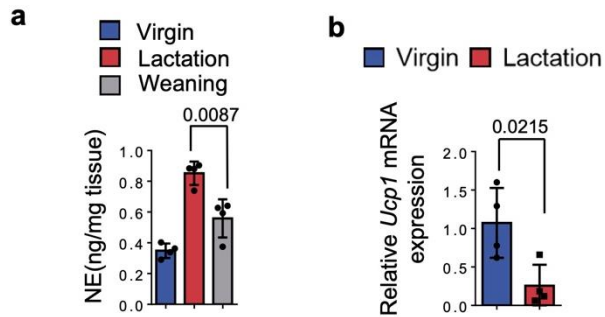

**Fig. S1: Sympathetic tone signals were increased during lactation with decrease of *Ucp1* mRNA expression in subscapular BAT.** (a) Norepinephrine levels of isolated cortical bone chips in virgin, lactating, and weaning mice by ELISA.  $n = 4$  mice in each group. (b) mRNA expression of *Ucp1* by RT-qPCR in subscapular BAT of WT virgin and lactating mice.  $n = 4$ . Data are presented as mean  $\pm$  SEM. Statistical significance was determined by one-way ANOVA with Dunnet post hoc test (a) and two-tailed Student's *t*-tests (b).

**Fig. S2**

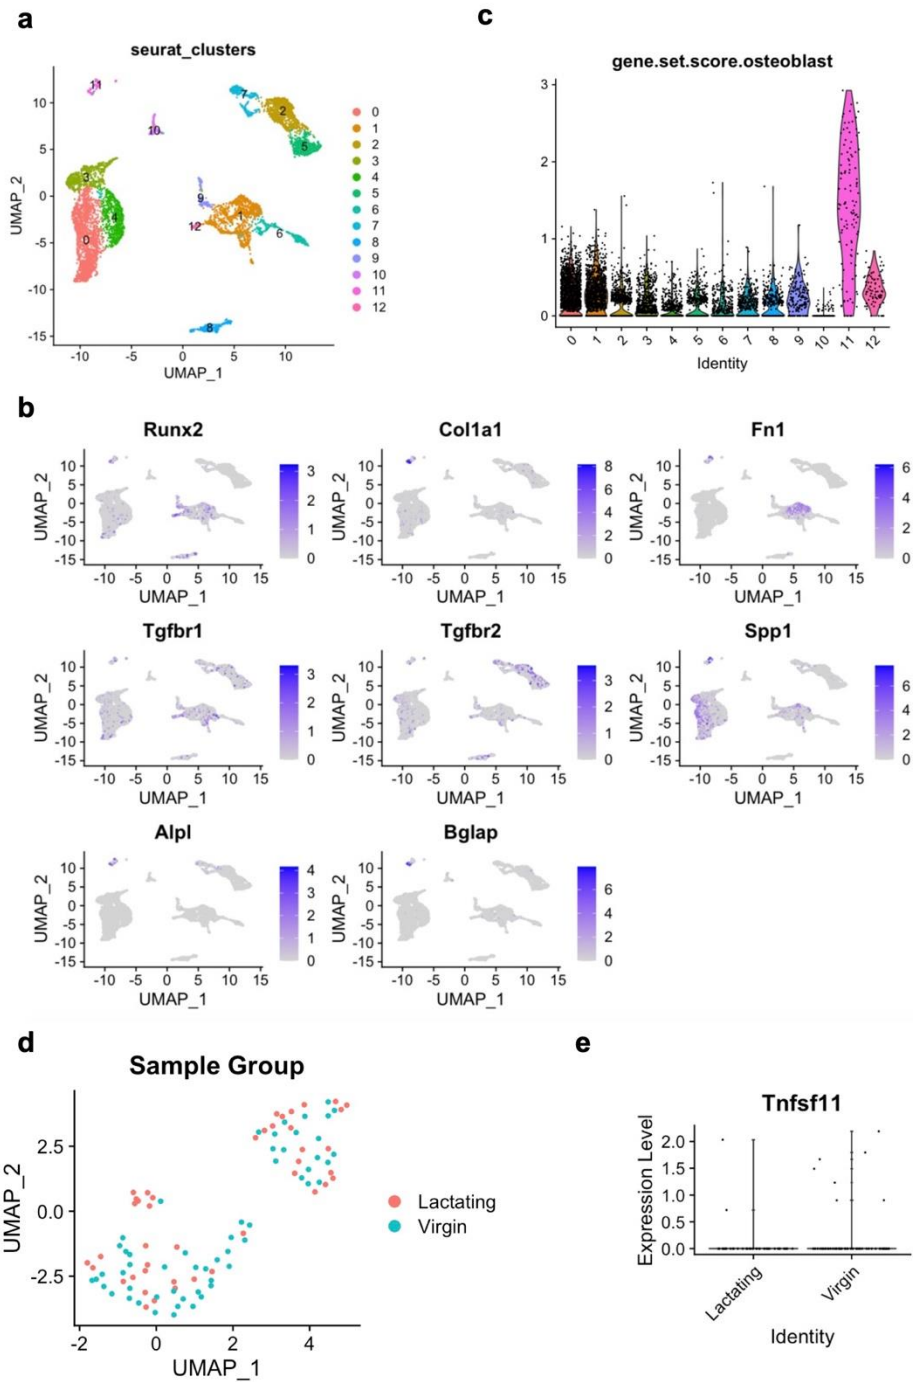

**Fig. S2: Bioinformatics analysis of scRNA-seq of femur from lactating and virgin mice.** (a) Long bones were subjected to serial collagenase/EDTA digestions (see methods), and cells from fractions 8, 9, and 10 were collected for flow cytometry. Live cells were sorted followed by single-cell RNA-seq library construction. Cell-clustering was performed in each group. n=8 per group. (b) Feature plots showing the expression

of known osteoblast lineage marker of each cluster. (c) Violin plots of osteoblast lineage marker genes expression in cell populations. (d) Feature plots showing the cells distribution in virgin and lactation groups in cluster 11. (e) Violin plots of *Tnfs11* gene expression in cluster 11.

**Fig.S3**

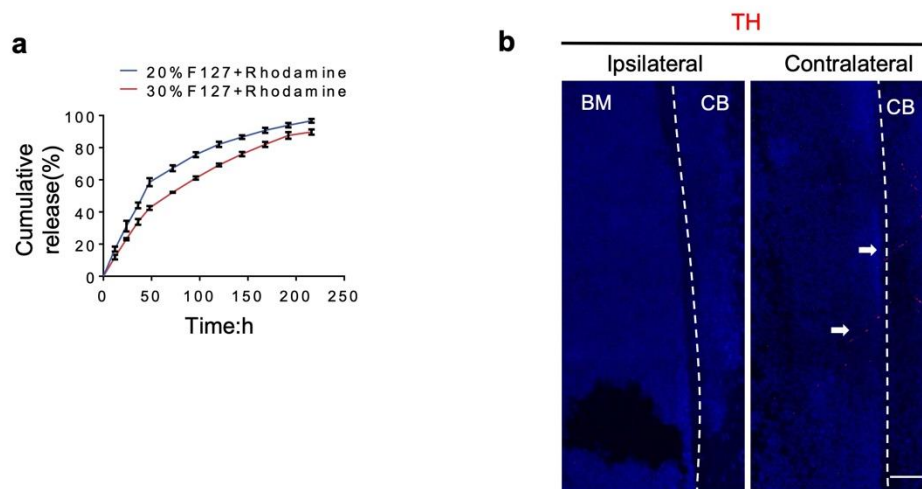

**Fig. S3: 6-OHDA loaded F127 hydrogel depleted local sympathetic nerves in femur. (a)** Release behavior of 20% and 30% F127 hydrogel. **(b)** Immunofluorescence staining of TH (red) in the endosteum area in femur bone marrow. CB, cortical bone; BM, bone marrow. n = 3 mice.
